# Supplementary material for: Video head impulse testing to differentiate vestibular neuritis from posterior circulation stroke in the emergency department: a prospective observational study
Source: HighWire-hosted journal article supplement (doi:10.1136/bmjno-2022-000284), 2022-05-01
Supplement: bmjno-2022-000284supp001_data_supplement.pdf [file bmjno-2022-000284supp001_data_supplement.pdf]

## Supplementary Table 1

Table 1. v-HIT gains and saccade prevalence by final diagnosis.

|                    | Vestibular<br>Neuritis<br>n=53<br>Mean (SD) | Posterior<br>Circulation Stroke<br>n=20<br>Mean (SD) | Migraine<br>n=21<br>Mean (SD) | p-value |
|--------------------|---------------------------------------------|------------------------------------------------------|-------------------------------|---------|
| VOR Gain           |                                             |                                                      |                               |         |
| Lateral (0.8)*     | 0.56 (0.29)                                 | 0.88 (0.28)                                          | 1.00 (0.18)                   | <0.001  |
| Anterior (0.7)*    | 0.65 (0.28)                                 | 0.85 (0.21)                                          | 0.91 (0.19)                   | 0.003   |
| Posterior (0.7)*   | 0.75 (0.23)                                 | 0.77 (0.21)                                          | 0.82 (0.21)                   | 0.56    |
| Catchup Saccades** | 51 (96%)                                    | 5 (20%)                                              | 0                             | <0.001  |

\*Lower limit of normal value. \*\*Catchup saccades identified visually on vHIT testing
